# Supplementary material for: c-Jun N-Terminal Kinase Phosphorylation Is a Biomarker of Plitidepsin Activity
Source: PubMed Central journal article supplement (PMC3707168; doi:10.3390/md11051677), 2013-05-21
Supplement: marinedrugs-11-01677-s001.pdf [file marinedrugs-11-01677-s001.pdf]

## Supplementary Material

**Figure S1.** Specificity of antibodies against phosphorylated JNK. JNK protein was immunoprecipitated from tumor extracts (#2.1 and #7.1; see Figure 2) using either anti-JNK antibody (sc-474, Santa Cruz; IP-1) or anti-p-JNK (#9251, Cell Signaling; IP-2). Two aliquots of each immunoprecipitate were subjected to SDS-PAGE followed by immunoblotting using anti-p-JNK sc-6254 antibody from Santa Cruz (panel A) or anti-p-JNK #9251 from Cell Signaling (panel B). For comparison, overexposed images are shown (low in both panels) to detect the signal in whole protein extracts.

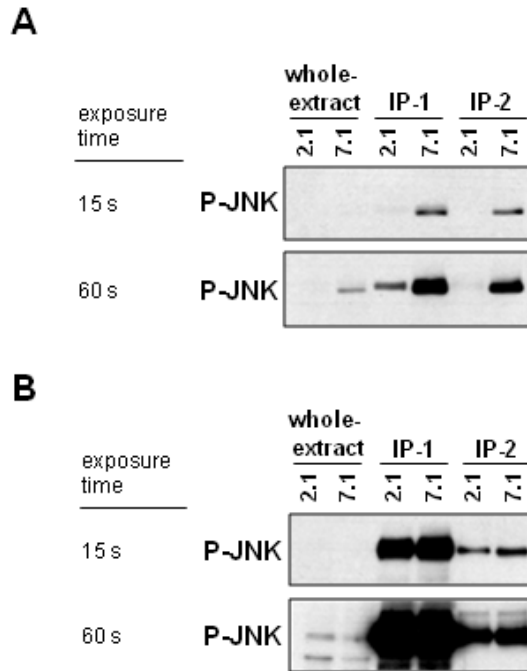

**Figure S2.** Levels of phosphorylated-p38MAPK and phosphorylated-ERK in xenografted tumors after plitidepsin treatment. K562 tumor-bearing mice were treated with plitidepsin (200  $\mu\text{g}/\text{kg}$ ) for the indicated times and tumors were excised, processed, and subjected to immunoblot analysis for total (p38) and phosphorylated p38MAPK protein (P-p38) and total (ERK) and phosphorylated ERK protein (P-ERK).

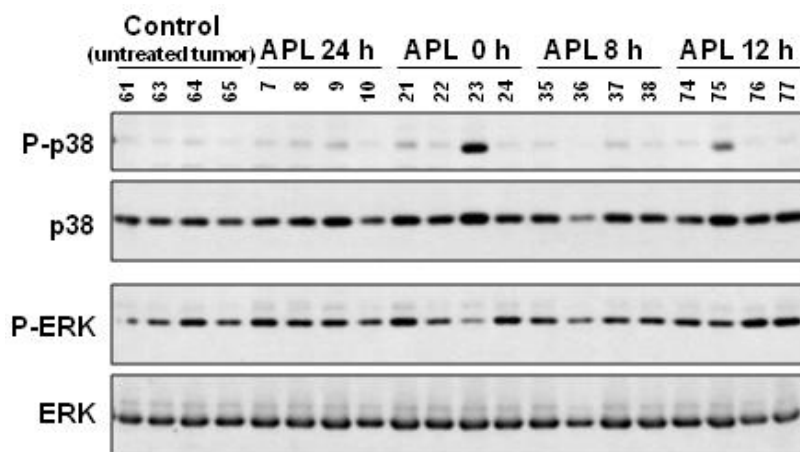

**Figure S3.** Levels of p27<sup>KIP1</sup> in tumors of K562-bearing mice after plitidepsin treatment. K562 xenografted mice were treated with plitidepsin (200 µg/kg) for the indicated times and tumors were excised, processed, and subjected to immunoblot analysis for p27<sup>KIP1</sup>. Actin was used as loading control.

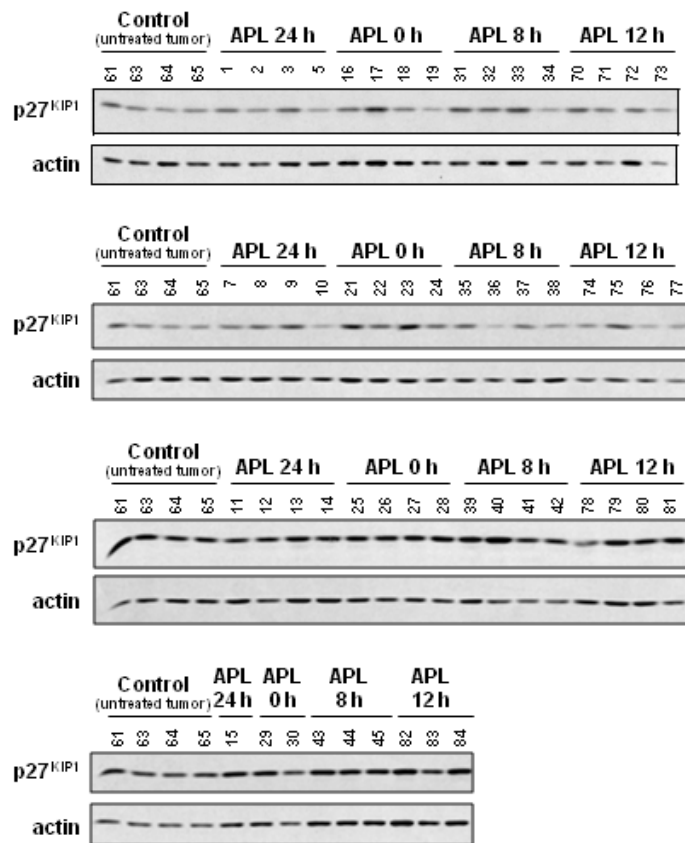

**Figure S4.** Levels of c-Abl and BCR-ABL proteins in tumors from mice xenografted with K562 cells. Western blot analysis of the expression of c-Abl and BCR-ABL (Bcr/Abl) proteins in tumors excised from mice xenografted with K562 cells that were treated with plitidepsin (200 µg/kg) for the indicated times. K, K562 cells; K + APL, plitidepsin-treated K562 cells.

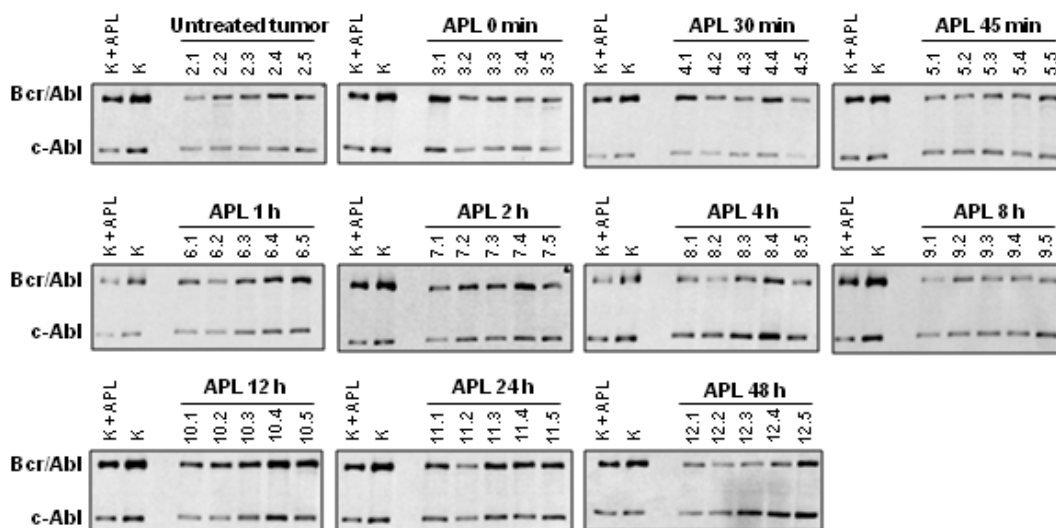

**Figure S5.** Levels of phosphorylated JNK in tumors and spleens of K562 tumor-bearing mice after plitidepsin treatment. Tumors (A) and spleens (B) from plitidepsin-treated xenografted mice (study #2) were excised, processed and subjected to Western blot analysis of total (JNK) and phosphorylated JNK (p-JNK). Actin was used as loading control. Values (Arbitrary Units, A.U.) correspond to p-JNK/JNK ratio in each sample normalized to actin and related to the same ratio in control sample #64.

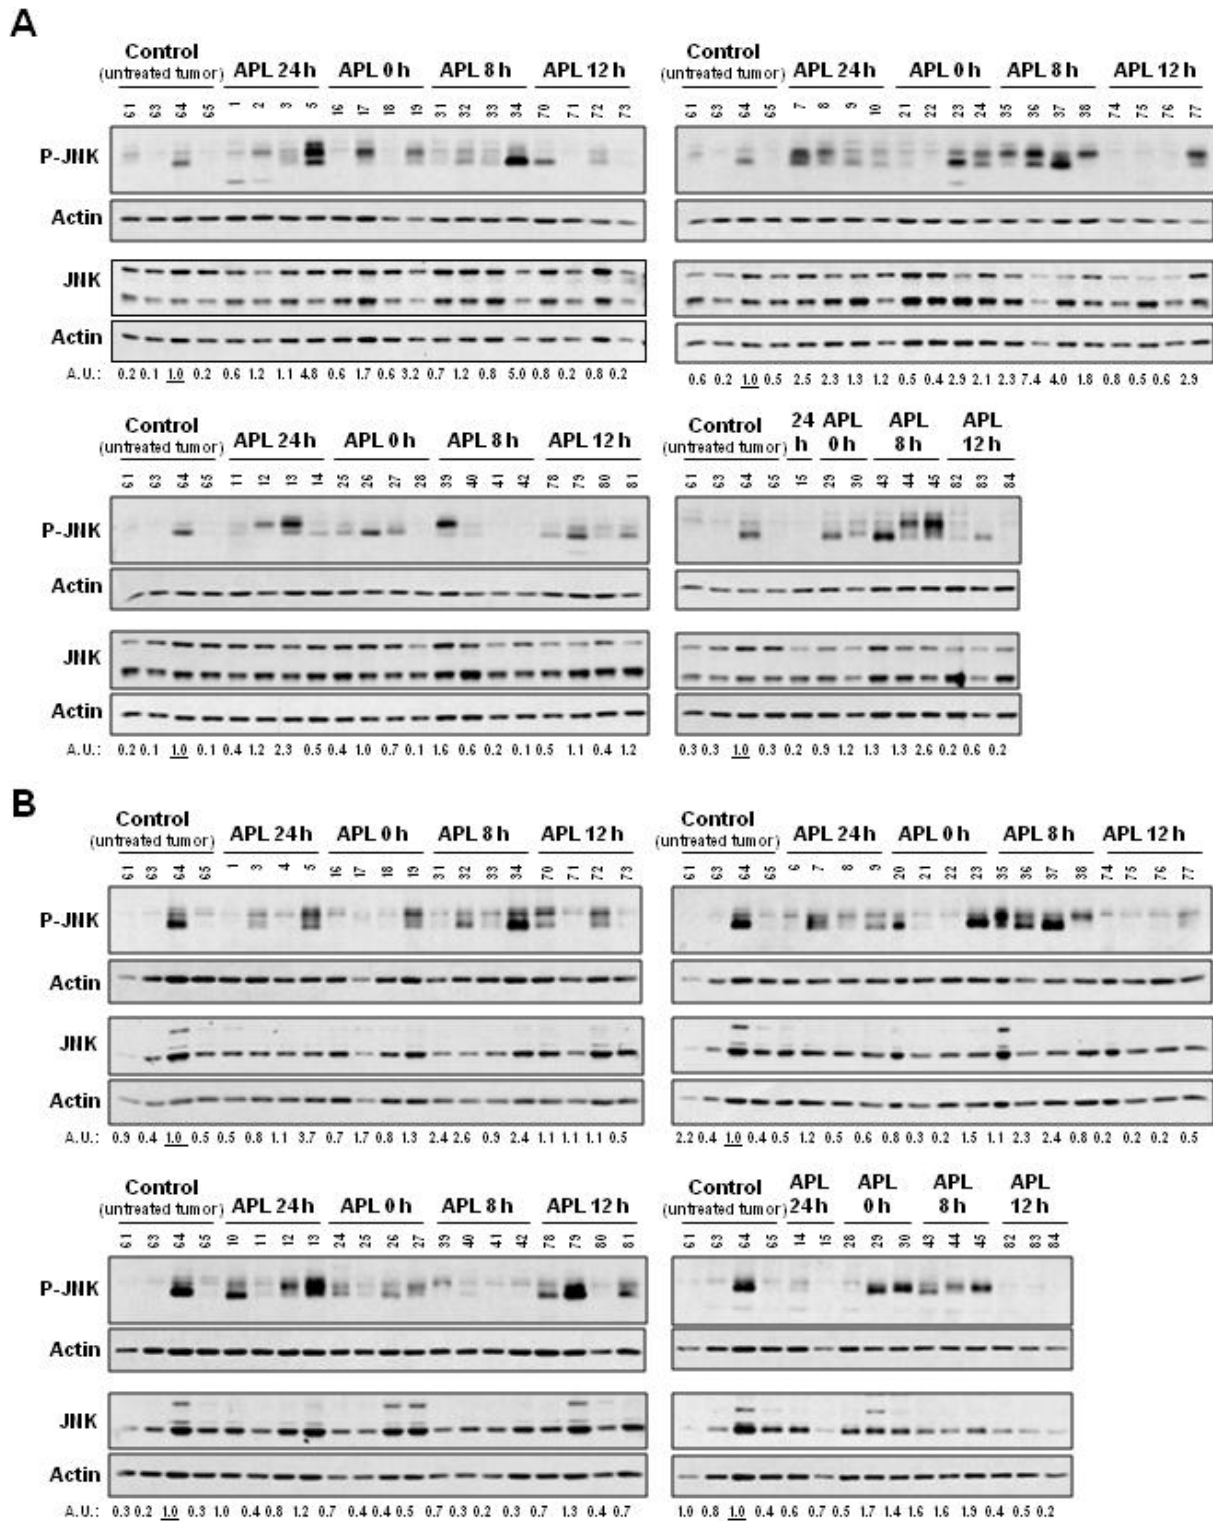

**Figure S6.** Levels of phosphorylated JNK in tumors and spleens from mice xenografted with human K562 leukemia cells after plitidepsin administration. Tumors (A) and spleens (B) from plitidepsin-treated xenografted mice (study #1; see Figure 2) were excised, processed and subjected to Western blot analysis of JNK and p-JNK together with control samples from study #2. Actin was used as loading control. Values (Arbitrary Units, A.U.) correspond to p-JNK/JNK ratio in each sample normalized to actin and related to the same ratio in control sample #64.

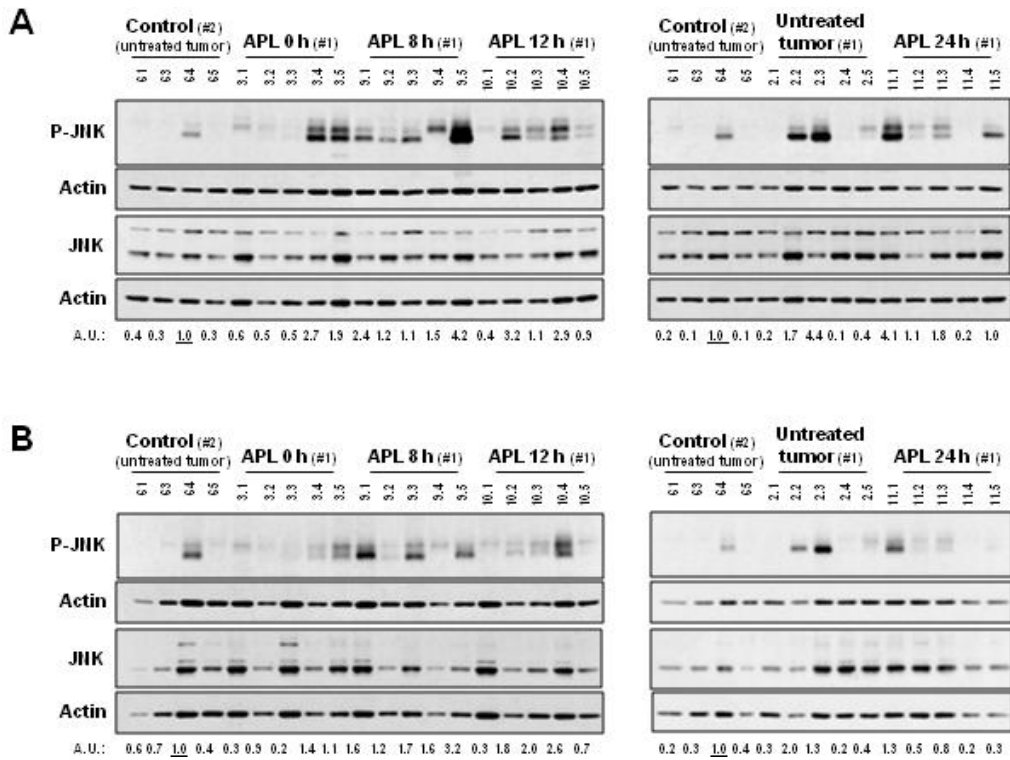

**Table S1.** Levels of plitidepsin in plasma from healthy rats after plitidepsin administration. Blood was isolated from non-tumor-bearing rats after 8 h i.v. administration of plitidepsin (1 mg/kg) (APL group; #APL1-10) or vehicle (control group; #C1-10), and the levels of plitidepsin in plasma were measured by a sensitive LC/MS-MS method [1]. Undetected; below limit of quantification, 0.05 ng/mL.

| Animal (No.) | Treatment   | Plasma [APL] (ng/mL) |
|--------------|-------------|----------------------|
| #C1          | Placebo     | undetected           |
| #C2          | Placebo     | undetected           |
| #C3          | Placebo     | undetected           |
| #C4          | Placebo     | undetected           |
| #C5          | Placebo     | undetected           |
| #C6          | Placebo     | undetected           |
| #C7          | Placebo     | undetected           |
| #C8          | Placebo     | undetected           |
| #C9          | Placebo     | undetected           |
| #C10         | Placebo     | undetected           |
| #APL1        | Plitidepsin | 2.00                 |
| #APL2        | Plitidepsin | 1.47                 |
| #APL3        | Plitidepsin | 1.60                 |
| #APL4        | Plitidepsin | 1.71                 |
| #APL5        | Plitidepsin | 2.61                 |
| #APL6        | Plitidepsin | 2.50                 |
| #APL7        | Plitidepsin | 2.07                 |
| #APL8        | Plitidepsin | 2.22                 |
| #APL9        | Plitidepsin | 1.76                 |
| #APL10       | Plitidepsin | 3.76                 |

## References

1. Yin, J.; Aviles, P.; Lee, W.; Ly, C.; Floriano, P.; Ignacio, M.; Faircloth, G. Development of a liquid chromatography/tandem mass spectrometry assay for the quantification of aplidin, a novel marine-derived antineoplastic agent, in human plasma. *Rapid Commun. Mass Spectrom.* **2003**, *17*, 1909–1914.

© 2013 by the authors; licensee MDPI, Basel, Switzerland. This article is an open access article distributed under the terms and conditions of the Creative Commons Attribution license (<http://creativecommons.org/licenses/by/3.0/>).
